# Supplementary material
Source: PubMed Central journal article supplement (PMC11629659)
Supplement: NIHMS2037379-supplement-Supplementary_Information.pdf [file NIHMS2037379-supplement-Supplementary_Information.pdf]

# Supplementary Information

|                                                                                                                                                                                         |           |
|-----------------------------------------------------------------------------------------------------------------------------------------------------------------------------------------|-----------|
| <b>Data processing and variant calling</b>                                                                                                                                              | <b>3</b>  |
| Supplementary Figure 1   Growth of data size with number of samples.                                                                                                                    | 4         |
| <b>Sample QC</b>                                                                                                                                                                        | <b>5</b>  |
| Hard filtering                                                                                                                                                                          | 5         |
| Sex inference                                                                                                                                                                           | 5         |
| Supplementary Table 1   Sex chromosome inference.                                                                                                                                       | 6         |
| Supplementary Figure 2   Sex inference.                                                                                                                                                 | 6         |
| Defining a high quality set of sites for QC                                                                                                                                             | 7         |
| Relatedness inference                                                                                                                                                                   | 7         |
| Ancestry assignment                                                                                                                                                                     | 7         |
| Supplementary Figure 3   UMAP embedding of PCA results (PCs 1-6 and 8-16) of all individuals in the gnomAD release.                                                                     | 8         |
| Filtering based on QC metrics                                                                                                                                                           | 8         |
| Supplementary Figure 4   The distribution of the number of SNPs for the African ancestry samples using the clustering-based and regression-based approach.                              | 9         |
| Supplementary Table 2   Number of individuals filtered by different QC metrics.                                                                                                         | 10        |
| Supplementary Table 3   Final number of individuals for each population.                                                                                                                | 10        |
| <b>Variant QC and annotation</b>                                                                                                                                                        | <b>11</b> |
| Supplementary Figure 5   Precision-recall curves for the previous site-level (VQSR), allele-specific (AS_VQSR) and allele-specific with transmitted singletons (AS_VQSR_TS) approaches. | 12        |
| Functional annotation                                                                                                                                                                   | 12        |
| <b>Constraint modeling and assessment</b>                                                                                                                                               | <b>13</b> |
| Estimation of trinucleotide context-specific mutation rates                                                                                                                             | 13        |
| Supplementary Figure 6   Trinucleotide context-specific mutation rate estimates.                                                                                                        | 14        |
| Comparison of Gnocchi and other metrics                                                                                                                                                 | 14        |
| Supplementary Figure 7   Performance of different metrics in identifying putative functional variants in stringent non-coding regions.                                                  | 15        |
| Analysis of constraint for chromosome X                                                                                                                                                 | 16        |
| Supplementary Figure 8   Distribution of Gnocchi scores on chromosome X.                                                                                                                | 16        |
| <b>The gnomAD browser</b>                                                                                                                                                               | <b>17</b> |
| Support for multiple reference genomes                                                                                                                                                  | 17        |

|                                              |           |
|----------------------------------------------|-----------|
| HGDP and 1000 Genomes population frequencies | 18        |
| Read data in non-coding regions              | 18        |
| <b>Supplementary Datasets</b>                | <b>19</b> |
| <b>Acknowledgements</b>                      | <b>21</b> |
| <b>References</b>                            | <b>24</b> |

The version of the Genome Aggregation Database (gnomAD) v3 presented in this manuscript is a catalog containing 759,302,267 short nuclear variants (644,267,978 passing stringent variant quality control [QC]) based on whole-genome sequencing of 76,156 samples (passing QC from an initial collection of 153,030 samples) mapped to the GRCh38 build of the human reference genome. In this release, we have included more than 3,000 new samples specifically chosen to increase the ancestral diversity of the resource, and for the first time, we provide individual genotypes in addition to variant calls for a subset of gnomAD, which includes new data from >60 distinct populations from Africa, Europe, the Middle East, South and Central Asia, East Asia, Oceania, and the Americas. Many of the processing, quality control, and analysis procedures closely resemble those from the 15,748 genomes from the gnomAD v2 manuscript (Karczewski et al. 2020). In this supplement, we highlight the differences where applicable.

## Data processing and variant calling

Whole genome sequences were mapped using `bwa mem 0.7.15.r1140` against the GRCh38 version `hs38DH`, which includes decoy contigs and HLA genes (FASTA located at <https://console.cloud.google.com/storage/browser/gcp-public-data--broad-references/hg38/v0/>).

Reads were then processed using the GATK best practices using GATK4 for BQSR and GATK3.5 for HaplotypeCaller to produce gVCFs.

Previous approaches (e.g. gnomAD v2) have typically involved the joint calling of the full cohort using GATK to produce a VCF file with a genotype for each sample at every position where at least one sample contains a non-reference allele. However, this approach would not scale to 150,000 samples, due to time and memory limitations, as well as storage: the output would require about 900TB and be prohibitively expensive to store and compute over.

Instead, we implemented and used a novel combiner within Hail (described in detail in (Karczewski et al. 2021)), which combines gVCFs into a sparse MatrixTable (MT). gVCFs are single-sample

files, which contain one row for each genomic position where a non-reference allele is found in the sample and, unlike VCFs, a row for each reference block start. Reference blocks are contiguous bases where the sample is homozygous reference within certain confidence boundaries. In gnomAD v3, we used the following three confidence bins: No coverage / evidence; Genotype quality < Q20; and Genotype quality  $\geq$  Q20. For each of these bins, the reference block stores the minimum and median coverage, and the minimum genotype quality for the bases residing in the block.

Using this new sparse data format, the full gnomAD v3 MT only requires 20TB of storage (Supplementary Figure 1). This new format scales linearly with the number of samples and is lossless with respect to the input sample gVCFs. Importantly, much more granular QC metrics, previously collapsed into the INFO field across samples, are preserved at each non-reference genotype in the data, such as strand balance, read position metrics (ReadPosRankSum), etc. Thus, new data can be appended to existing data without re-processing of the previously processed samples. We demonstrated the power of this data format by adding 4,598 genomes to our original gnomAD v3 release of 71,702 genomes. Finally, while not currently implemented, it is possible to re-export a gVCF from this format, removing the need for storing the gVCFs.

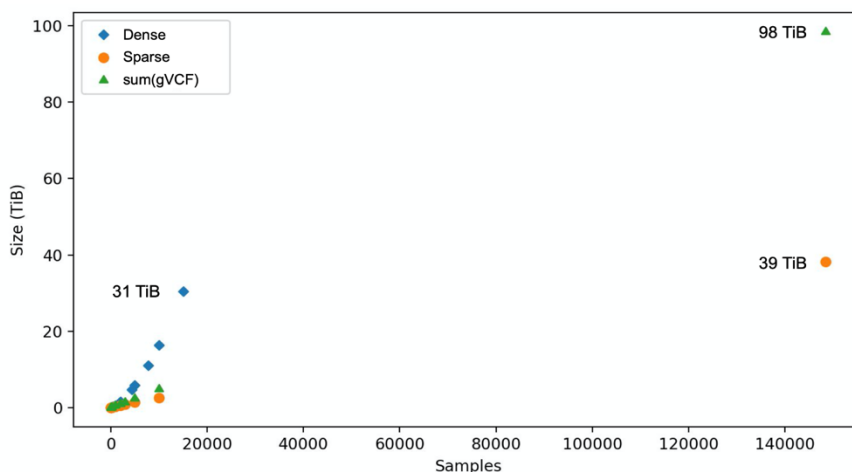

**Supplementary Figure 1 | Growth of data size with number of samples.**

The dense representation (VCF) grows super-linearly, while the aggregate gVCF size and the SparseMT representation grow linearly. The final gnomAD v3 sparse dataset was smaller still (20TiB) due to increased compression from broader reference block confidence bins.

## Sample QC

The sample QC process was similar to that of gnomAD v2 (Karczewski et al. 2020). Briefly, hard filters were applied to remove samples of poor quality as well as samples that did not have permissions for public release of aggregate data. Next, we inferred sex for each sample and removed samples with sex chromosome aneuploidies or ambiguous sex assignment: here, we modified the original pipeline by using normalized coverage on both X and Y in order to infer sample sex. We defined and used a set of high quality sites to infer relatedness between samples, allowing us to filter to a set of unrelated individuals, and assign ancestry to each sample. Finally, we filtered samples that were determined to be outliers based on sample QC metrics, using a novel regression-based method. All quality control and processing steps were performed using Hail 0.2.62 (Hail Team. Hail 0.2.62-84fa81b9ea3d. <https://github.com/hail-is/hail/commit/84fa81b9ea3d>).

## Hard filtering

We computed sample QC metrics using the Hail 'sample\_qc' module on all autosomal bi-allelic single nucleotide variants (SNVs). We removed samples that were clear outliers for the number of SNVs (< 2.4 million or > 3.75 million), number of singletons (> 100,000), ratio of heterozygous to homozygous variants > 3.3, and a mean coverage on chromosome 20 of < 15X. Additionally, for 87,756 of the 92,306 releasable samples where BAM-level metrics were available, we removed samples that were outliers for percent contamination (> 5%), percent chimeras: (> 5%), and median insert size (< 250bp).

## Sex inference

To infer sex, we computed the mean coverage on non-pseudoautosomal (non-PAR) regions of chromosome X and Y and normalized these values using the mean coverage on chromosome 20. In addition, we ran the Hail 'impute\_sex' function on the non-PAR regions of chromosome X to compute the

inbreeding coefficient F-stat. Based on these three metrics, we assigned a number of X chromosomes based on normalized X coverage 0-1.2913 (1 X), 1.4477-2.3961 (2 X), or 2.4909+ (3 X), and a number of Y chromosomes based on normalized Y coverage 0-0.1 (no Y), 0.1-1.1645 (1 Y), 1.2381+ (2 Y). The final assignments are shown in Supplementary Table 1 and Supplementary Figure 2.

**Supplementary Table 1 | Sex chromosome inference.**

The coverages for normalized X and Y coverages are shown for each sex chromosome inference assignment, alongside total number of releasable samples that pass QC to this point.

| Inferred sex chromosomes | Total  | X chromosome coverage |              | Y chromosome coverage |              |
|--------------------------|--------|-----------------------|--------------|-----------------------|--------------|
|                          |        | Lower cutoff          | Upper cutoff | Lower cutoff          | Upper cutoff |
| XX                       | 46,361 | 1.4477                | 2.3961       | 0                     | 0.1          |
| XY                       | 45,129 | 0                     | 1.2913       | 0.1                   | 1.1645       |
| XO                       | 425    | 0                     | 1.2913       | 0                     | 0.1          |
| XXY                      | 107    | 1.4477                | 2.3961       | 1.2381                | 1.1645       |
| XXX                      | 34     | 2.4909                | -            | 0                     | 0.1          |
| XYY                      | 31     | 0                     | 1.2913       | 1.2381                | -            |
| XXXY                     | 4      | 2.4909                | -            | 0.1                   | 1.1645       |
| XXYY                     | 3      | 1.4477                | 2.3961       | 1.2381                | -            |
| ambiguous                | 212    | All others            |              | All others            |              |

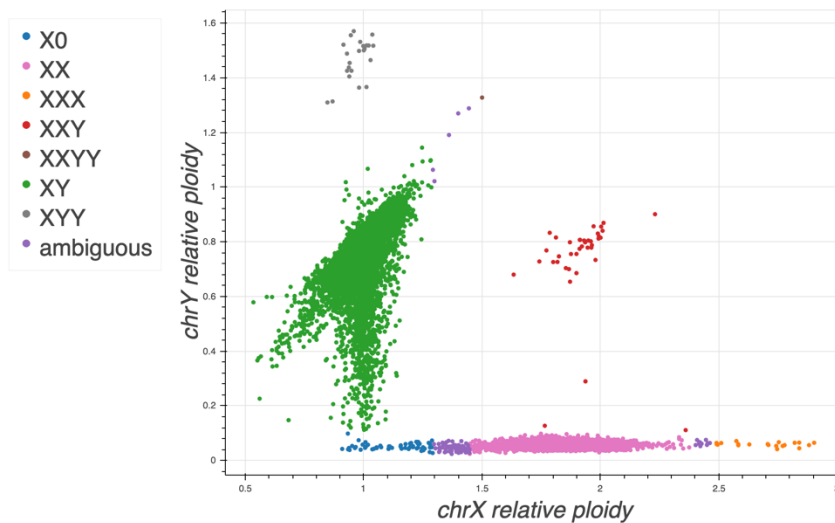

**Supplementary Figure 2 | Sex inference.**

A scatter plot of ploidy on chromosomes X and Y is shown for each individual in the dataset. Points are colored by inferred sex haplotype.

## Defining a high quality set of sites for QC

In order to perform relatedness and ancestry inference, we first selected a set of high quality QC sites as follows:

1. We took all sites that were used for gnomAD v2.1 and lifted them over to GRCh38
2. We added ~5k sites widely used for quality control of GWAS data (Purcell et al. 2014) and lifted these sites over to GRCh38
3. From these two sets of sites, we then selected all bi-allelic SNVs with an Inbreeding coefficient  $> -0.25$  (no excess of heterozygotes)

In total, we ended up with 76,419 high quality variants for relatedness and ancestry inference.

## Relatedness inference

We used PC-Relate (implemented in Hail 'pc\_relate') (Conomos et al. 2016) to compute relatedness, followed by Hail's 'maximal\_independent\_set' in order to select as many samples as possible, while asserting that the final dataset includes no pairs of first and second degree relatives. When multiple samples could be selected, we kept the sample with the highest coverage as a tie-breaker.

## Ancestry assignment

We used principal component analysis (PCA; using the 'hwe\_normalized\_pca' function in Hail) on the set of high quality variants in our unrelated samples, and selected the first 16 PCs to assign ancestry. We then trained a random forest classifier using 22,054 samples with known ancestry and 14,828 samples for which we had a population label from gnomAD v2 as training samples and using the PCs as features. We assigned ancestry to all samples for which the probability of that ancestry was  $> 75\%$  according to the random forest model. All other samples were unassigned (labeled oth). A UMAP embedding of the first

PCs is shown in Supplementary Figure 3 (Diaz-Papkovich, Anderson-Trocme, and Gravel 2018; McInnes et al. 2018).

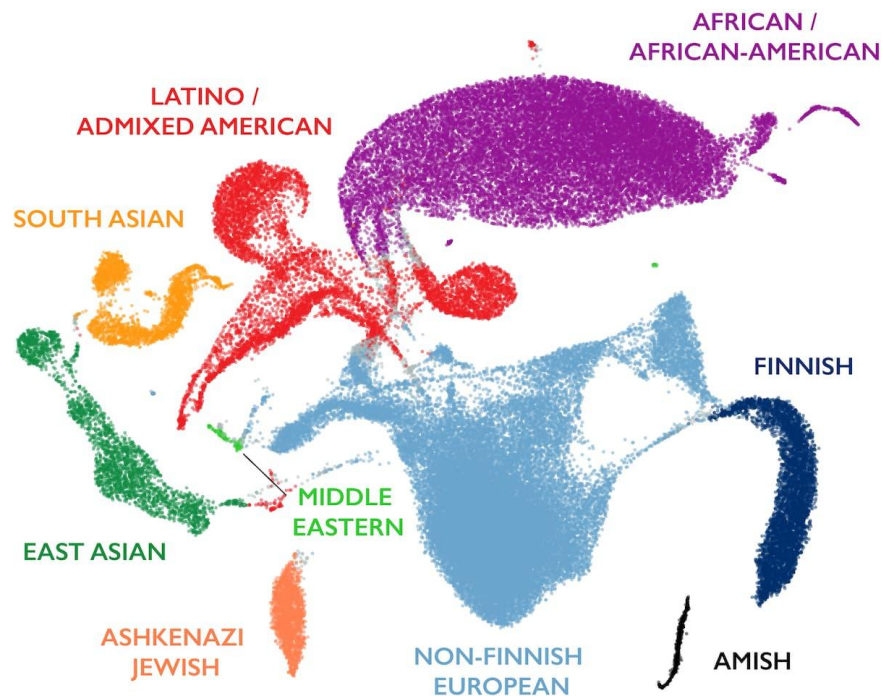

**Supplementary Figure 3 | UMAP embedding of PCA results (PCs 1-6 and 8-16) of all individuals in the gnomAD release.**

This embedding is an illustration of the structure present in the dataset: note that long-range distances in this projection do not reflect genetic distance between populations.

## Filtering based on QC metrics

In gnomAD v2, we grouped samples based on their ancestry assignments and filtered outliers within each ancestry based on various quality metrics such as number of SNPs. Here, we built a single model for each metric across all individuals, regressing out the PCs computed during the ancestry assignment, and filtered samples based on the residuals for each of the QC metrics. This strategy allowed us to consider the samples' ancestry as a continuous spectrum and was particularly beneficial for admixed samples and samples that did not get an ancestry assignment (assigned as oth; previously, we lumped all these samples together even though they were drawn from multiple populations). An illustration of the improvement from this new method is shown in Supplementary Figure 4.



### Clustering-based approach

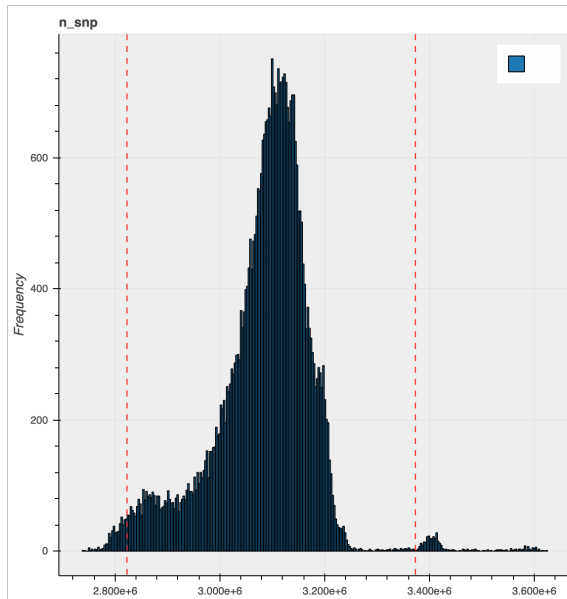

### Regression-based approach

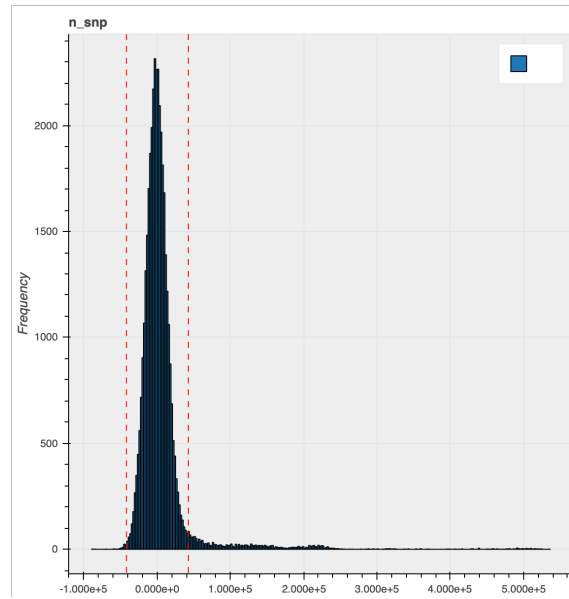

**Supplementary Figure 4 | The distribution of the number of SNPs for the African ancestry samples using the clustering-based and regression-based approach.**

We used the sample QC metrics computed using the Hail ‘sample\_qc’ module on all autosomal bi-allelic SNVs and filtered samples that were 4 median absolute deviations (MADs) from the median for the following metrics: n\_snp, r\_ti\_tv, r\_insertion\_deletion, n\_insertion, n\_deletion, r\_het\_hom\_var, n\_het, n\_hom\_var, n\_transition and n\_transversion. In addition, we filtered samples that fell outside 8 MADs above the median n\_singleton metric and over 4 MADs above the median r\_het\_hom\_var metric. The number of samples filtered by different QC metrics is summarized in Supplementary Table 2 and the final set of samples is shown in Supplementary Table 3.

After some downstream analysis, we noted that this regression approach removes samples from populations with extreme diversity, such as individuals from the San, Papuan, and Pygmy populations in HGDP. We have adjusted this filter for future releases and provide the data for all these individuals in a

joint-called subset of gnomAD under release v3.1.2. However, we note that this current dataset excludes these individuals, as newly computing the frequency metrics was prohibitively expensive.

**Supplementary Table 2 | Number of individuals filtered by different QC metrics.**

| QC filter                       | QC metrics                            | Number of genomes filtered |
|---------------------------------|---------------------------------------|----------------------------|
| Hard filter                     | hardfilter_TCGA_tumor_sample          | 2,750                      |
|                                 | hardfilter_exlcuded_cf_enrichment     |                            |
|                                 | hardfilter_failed_fingerprinting      |                            |
|                                 | hardfilter_r_het_hom_var              |                            |
|                                 | hardfilter_contamination              |                            |
|                                 | hardfilter_coverage                   |                            |
|                                 | hardfilter_n_snp                      |                            |
|                                 | hardfilter_insert_size                |                            |
|                                 | hardfilter_n_singleton                |                            |
| hardfilter_chimera              |                                       |                            |
| Sex filter                      | sex_ambiguous                         | 224                        |
|                                 | sex_aneuploidy                        |                            |
| Outlier filter                  | outlier_n_snp_residual                | 5,120                      |
|                                 | outlier_n_singleton_residual          |                            |
|                                 | outlier_r_ti_tv_residual              |                            |
|                                 | outlier_r_insertion_deletion_residual |                            |
|                                 | outlier_n_insertion_residual          |                            |
|                                 | outlier_n_deletion_residual           |                            |
|                                 | outlier_r_het_hom_var_residual        |                            |
|                                 | outlier_n_transition_residual         |                            |
| outlier_n_transversion_residual |                                       |                            |
| Related filter                  | related                               | 8,056                      |

**Supplementary Table 3 | Final number of individuals for each population.**

| Population code | Description                     | Number of genomes |
|-----------------|---------------------------------|-------------------|
| afr             | African/African American        | 20,744            |
| ami             | Amish                           | 456               |
| amr             | Latino/Admixed American         | 7,647             |
| asj             | Ashkenazi Jewish                | 1,736             |
| eas             | East Asian                      | 2,604             |
| fin             | Finnish                         | 5,316             |
| nfe             | Non-Finnish European            | 34,029            |
| mid             | Middle Eastern                  | 158               |
| sas             | South Asian                     | 2,419             |
| oth             | Other (population not assigned) | 1,047             |
| Total           |                                 | 76,156            |

## Variant QC and annotation

Because the new sparse MatrixTable format contains all the information encoded in the gVCFs, we computed all variant QC metrics within Hail, which enabled the separate computation for each allele (rather than site-level as was typically done previously). The code to compute these metrics is available at [https://github.com/broadinstitute/gnomad\\_methods/blob/master/gnomad/utis/sparse\\_mt.py](https://github.com/broadinstitute/gnomad_methods/blob/master/gnomad/utis/sparse_mt.py). We then used the allele-specific version of GATK Variant Quality Score Recalibration (VQSR) to compute a confidence score for each allele in the dataset. We used the following allele-specific features: FS, SOR, ReadPosRankSum, MQRankSum, and QD for SNPs and indels, as well as MQ for SNPs.

In addition to the GATK bundle training resources (HapMap, Omni, 1000 Genomes, and Mills indels), we also used a set of ~19M transmitted singletons (alleles observed exactly twice in the dataset, only in a parent/child duo) from 6,743 trios present in our raw data.

We assessed the results of the filtering by plotting, as a function of quality tranche, the number of potential *de novo* mutations in the 6,743 trios, the Ti/Tv ratio, proportion singletons, proportion bi-allelic variants, and variants in ClinVar, as well as precision and recall in two truth samples present in our data: NA12878 and a pseudo-diploid sample (A mixture of DNA [est. 50.7% / 49.3%] from two haploid CHM cell lines).

In gnomAD v3 (prior to the addition of 4,598 new samples), we assessed the performance of the classic site-level VQSR, to a new algorithm, the allele-specific VQSR (AS\_VQSR), as well as one with transmitted singletons included (AS\_VQSR\_TS). Supplementary Figure 5 illustrates the superior performance of the allele-specific approach by precision-recall curves of gold standard SNVs and indels from one sample, NA12878.

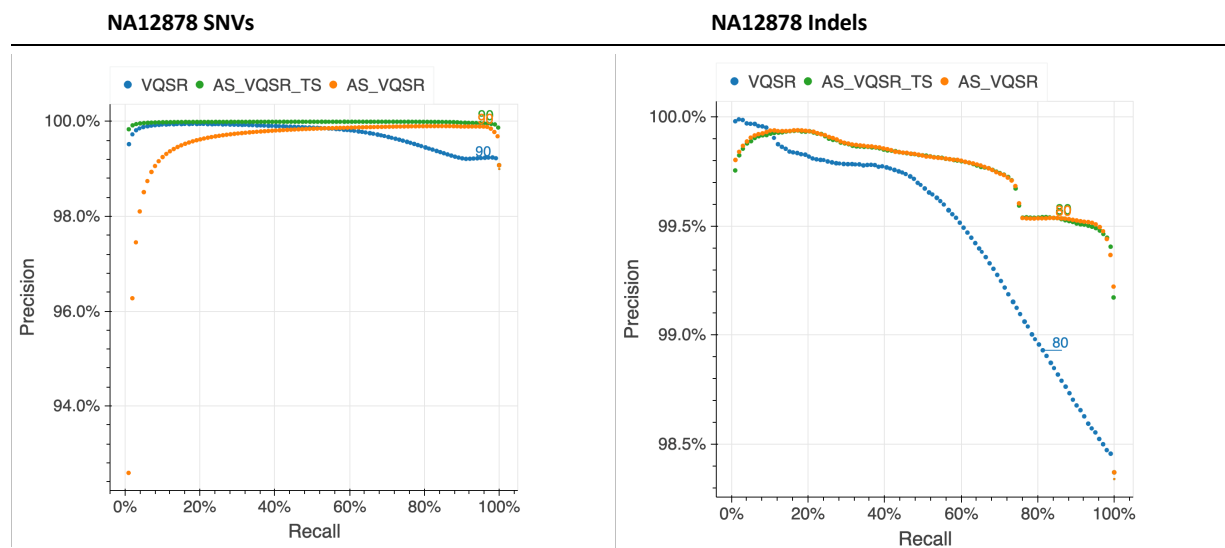

**Supplementary Figure 5 | Precision-recall curves for the previous site-level (VQSR), allele-specific (AS\_VQSR) and allele-specific with transmitted singletons (AS\_VQSR\_TS) approaches.**

Both allele-specific approaches outperform VQSR, while AS\_VQSR\_TS shows a slight improvement for SNVs.

In addition to VQSR, we also applied the following hard filters:

- AC0: No sample had a high quality genotype at this variant site ( $GQ \geq 20$ ,  $DP \geq 10$  and allele balance  $> 0.2$  for heterozygotes)
- InbreedingCoeff: there was an excess of heterozygotes at the site compared to Hardy-Weinberg expectations using a threshold of  $-0.3$  on the InbreedingCoefficient metric.

In total, 12.2% of SNVs and 32.5% of indels were filtered, resulting in 569,860,911 SNVs and 74,407,067 indels that passed all filters in our release.

## Functional annotation

All variants are annotated using version 101 of the Variant Effect Predictor (VEP) based on the gene models from Gencode v35, with the LOFTEE plugin as described previously (Karczewski et al. 2020). For GRCh38, LOFTEE is similar to the previous implementation, without the extended splice predictions.

## Constraint modeling and assessment

### Estimation of trinucleotide context-specific mutation rates

To calculate the baseline mutation rate for each substitution in a trinucleotide context ( $XY_1Z \rightarrow XY_2Z$ ), we count the instances of each trinucleotide context in the autosomes of the human genome, excluding sites where 1) a low-quality variant is called in gnomAD v3 (INFO/FILTER does not equal to 'PASS'), 2) the mean coverage in the gnomAD genomes is  $<30X$  or  $>32X$ , or 3) the region is marked as 'blacklisted regions' (ENCODE <https://www.encodeproject.org/files/ENCFF356LFX/>) or 'gaps' (telomeres and centromeres). This resulted in 6,079,733,538 possible variants at 2,026,577,846 autosomal sites. Using this dataset, we compute the proportion of possible variants observed (hereafter referred to as 'proportion observed') for each substitution and context, using rare variants observed in gnomAD with an allele frequency (AF)  $\leq 0.1\%$ . Our estimates are well-correlated with the mutation rates reported by Carlson et al using an independent dataset (the Bipolar Research in Deep Genome and Epigenome Sequencing [BRIDGES] study; Supplementary Figure 6a) and are highly stable across different AF thresholds (0.01%-1%; Supplementary Figure 6b).

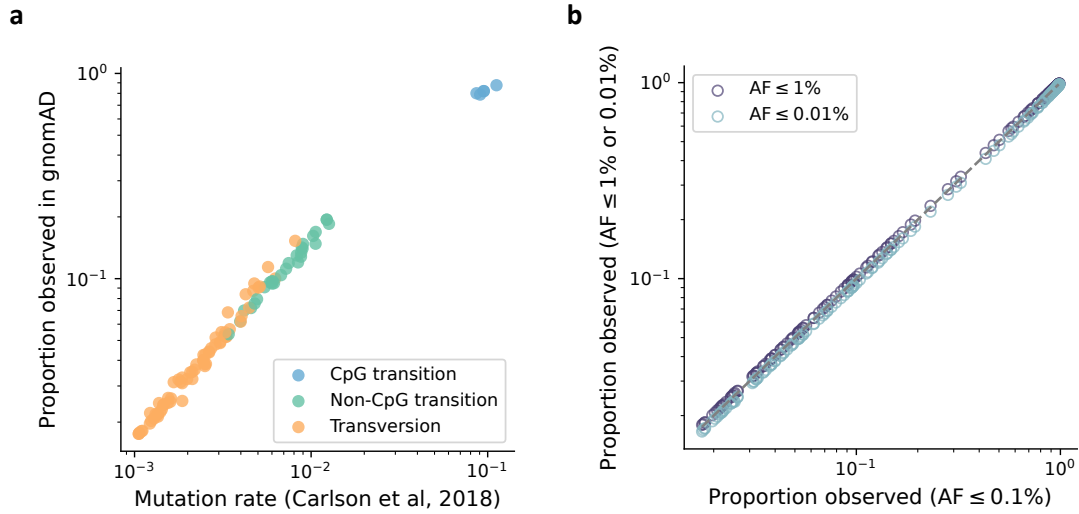

**Supplementary Figure 6 | Trinucleotide context-specific mutation rate estimates.**

The mutation rates estimated and used in this study are well-correlated with previous estimates from Carson et al using an independent dataset (a) and are highly stable across different AF thresholds (b).

### Comparison of Gnocchi and other metrics

Benchmarking on various validation datasets, we show that Gnocchi outperforms other constraint/conservation metrics – Orion, CDTS, gWRVIS, DR, phyloP, phastCons, and GERP – in identifying putative functional non-coding variants (Fig. 3 and Extended Fig. 4). We note that all evaluations were performed within the non-coding genome for explicitly comparing the metrics in prioritizing non-coding variants. We further eliminate potential bias from nearby genes by recapitulating the results within regions >10kb away from any protein-coding exons (Supplementary Fig. 7).

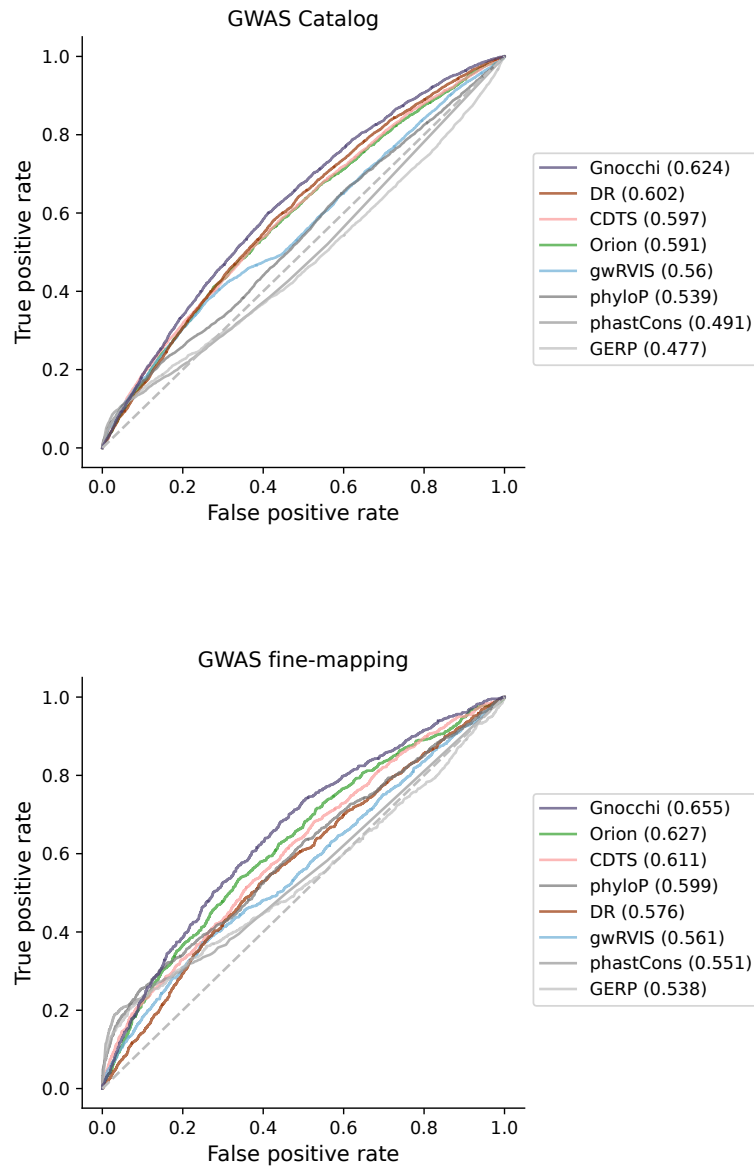

**Supplementary Figure 7 | Performance of different metrics in identifying putative functional variants in stringent non-coding regions.**

As described in Methods, the stringent non-coding variant sets include 4,379 GWAS Catalog variants, 967 GWAS fine-mapping variants, a high-confidence subset of 59 fine-mapped variants, and 45 ClinVar pathogenic variants. Analyses were not performed for the latter two due to small sample sizes.

## Analysis of constraint for chromosome X

Due to the lack of DNM data on chromosome X, we built our mutational model using autosomal regions and extrapolated it to construct the Gnocchi metric for chromosome X. Consistent with the results in autosomes, protein-coding sequences overall show a significantly higher Gnocchi score than non-coding regions (median=1.72 versus 0.36, Wilcoxon  $P < 10^{-200}$ ; Supplementary Fig. 8a), and constrained non-coding regions are significantly enriched for regulatory elements (e.g., ENCODE cCREs; Supplementary Fig. 8b).

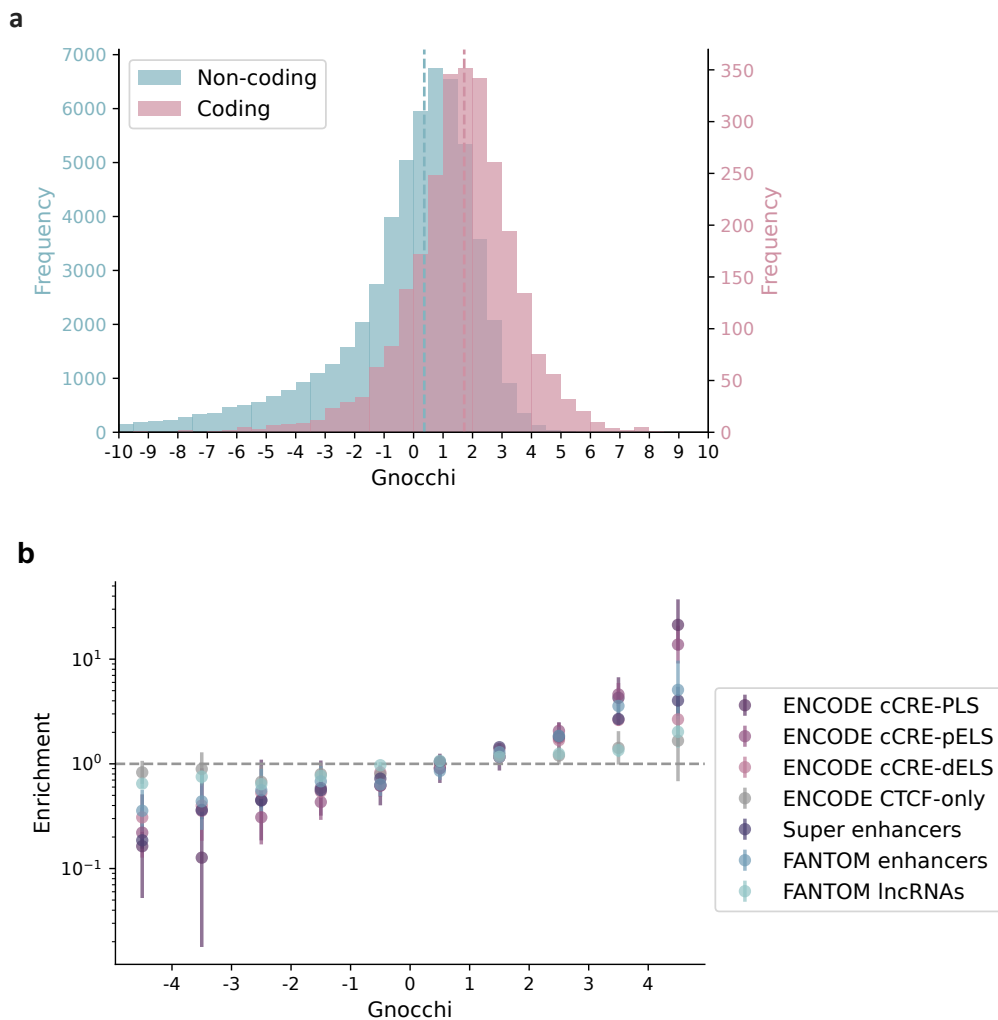

### Supplementary Figure 8 | Distribution of Gnocchi scores on chromosome X.

a, Windows overlapping coding regions (N=2,647 with  $\geq 1$ bp coding sequence; red) overall exhibit a higher Gnocchi score (stronger negative selection) than windows that are exclusively non-coding (N=55,055; blue). Dashed lines



indicate the medians. b, Constrained non-coding regions are enriched for regulatory elements. Enrichment was evaluated by comparing the proportion of non-coding 1kb windows, binned by Gnocchi, that overlap with a given functional annotation to the genome-wide average. Error bars indicate 95% confidence intervals of the odds ratios. cCRE, candidate cis-regulatory element: N=1,049 with a promoter-like signature (PLS), N=3,319 with a proximal enhancer-like signature (pELS), N=15,969 with a distal enhancer-like signature (dELS), N=1,807 bound by CTCF without a regulatory signature (CTCF-only); Super enhancers: N=3,655; FANTOM enhancers: N=1,412; FANTOM lncRNAs: N=1,688. See Methods for details on data collection.

## The gnomAD browser

### Support for multiple reference genomes

Alongside the release of gnomAD v3, we wanted to retain information from previous releases (gnomAD v2) in the browser for reproducibility. To do so, we added support for multiple reference genomes to the browser – see below an example of the same gene viewed in gnomAD v2 (left) and v3 (right).

| PCSK9 proprotein convertase subtilisin/kexin type 9                                                                                                                                                                                                                                                                                                                                                                                                                                     | PCSK9 proprotein convertase subtilisin/kexin type 9                                                                                                                                                                                                                                                                                                                                                                                                                                                                                                                    |
|-----------------------------------------------------------------------------------------------------------------------------------------------------------------------------------------------------------------------------------------------------------------------------------------------------------------------------------------------------------------------------------------------------------------------------------------------------------------------------------------|------------------------------------------------------------------------------------------------------------------------------------------------------------------------------------------------------------------------------------------------------------------------------------------------------------------------------------------------------------------------------------------------------------------------------------------------------------------------------------------------------------------------------------------------------------------------|
| <p><b>Genome build</b> GRCh37 / hg19</p> <p><b>Ensembl gene ID</b> ENSG00000169174.9</p> <p><b>Ensembl canonical transcript</b> <a href="#">ENST00000302118.5</a></p> <p><b>Other transcripts</b> <a href="#">ENST00000452118.2</a>, <a href="#">ENST00000490692.1</a>, <a href="#">ENST00000543384.1</a></p> <p><b>Region</b> <a href="#">1:55505221-55530525</a></p> <p><b>External resources</b> <a href="#">Ensembl</a>, <a href="#">UCSC Browser</a>, and <a href="#">more</a></p> | <p><b>Genome build</b> GRCh38 / hg38</p> <p><b>Ensembl gene ID</b> ENSG00000169174.11</p> <p><b>MANE Select transcript</b> <a href="#">ENST00000302118.5</a> / NM_174936.4</p> <p><b>Ensembl canonical transcript</b> <a href="#">ENST00000302118.5</a></p> <p><b>Other transcripts</b> <a href="#">ENST00000673662.1</a>, <a href="#">ENST00000673726.1</a>, and <a href="#">3 more</a></p> <p><b>Region</b> <a href="#">1:55039447-55064852</a></p> <p><b>External resources</b> <a href="#">Ensembl</a>, <a href="#">UCSC Browser</a>, and <a href="#">more</a></p> |

Additionally, to make it easier to transition between reference builds and gnomAD versions, we added a liftover function for all variants – see below an example of Liftover section on a gnomAD v2 (left) and v3 (right) variant page.

| Liftover                                                                                                                                                                            | Liftover                                                                                                                                                                            |
|-------------------------------------------------------------------------------------------------------------------------------------------------------------------------------------|-------------------------------------------------------------------------------------------------------------------------------------------------------------------------------------|
| <p>The following GRCh37 variant lifts over to this variant:</p> <ul style="list-style-type: none"> <li>1-55516888-G-GA<br/><a href="#">View variant in gnomAD v2.1.1</a></li> </ul> | <p>This variant lifts over to the following GRCh38 variant:</p> <ul style="list-style-type: none"> <li>1-55051215-G-GA<br/><a href="#">View variant in gnomAD v3.1.2</a></li> </ul> |

## HGDP and 1000 Genomes population frequencies

For variants found in the HGDP / 1000 Genomes subset, the browser now includes population frequencies based on known populations from the HGDP / 1000 Genomes sample metadata – see below an example of the detailed population frequencies; here, we show the frequency table for the 1000 Genomes project.

**Population Frequencies** ⓘ

gnomAD HGDP **1KG**

| Population                             | Allele Count | Allele Number | Number of Homozygotes | Allele Frequency |
|----------------------------------------|--------------|---------------|-----------------------|------------------|
| ▶ European                             | 21           | 1034          | 0                     | 0.02031          |
| Overall                                | 11           | 686           | 0                     | 0.01603          |
| Puerto Ricans from Puerto Rico         | 6            | 198           | 0                     | 0.03030          |
| Mexican Ancestry from Los Angeles, USA | 2            | 126           | 0                     | 0.01587          |
| ▼ <u>Admixed American</u>              |              |               |                       |                  |
| Peruvians from Lima, Peru              | 2            | 172           | 0                     | 0.01163          |
| Colombians from Medellin, Colombia     | 1            | 190           | 0                     | 0.005263         |
| XX                                     | 8            | 346           | 0                     | 0.02312          |
| XY                                     | 3            | 340           | 0                     | 0.008824         |
| ▶ African                              | 0            | 1264          | 0                     | 0.000            |
| ▶ East Asian                           | 0            | 1002          | 0                     | 0.000            |
| ▶ South Asian                          | 0            | 1014          | 0                     | 0.000            |
| XX                                     | 21           | 2506          | 0                     | 0.008380         |
| XY                                     | 11           | 2494          | 0                     | 0.004411         |
| <b>Total</b>                           | <b>32</b>    | <b>5000</b>   | <b>0</b>              | <b>0.006400</b>  |

## Read data in non-coding regions

In previous releases, we provide short read data for exonic variants at the bottom of the variant page to enable detailed quality assessment. In this release, we provide short read data for all variants, including those in non-coding regions.

## Supplementary Datasets

**Supplementary Dataset 1 | Variant counts in gnomAD genomes and mutation rates.** The number of possible and observed rare ( $AF \leq 0.1\%$ ) SNVs in the 76,156 gnomAD genomes, along with the estimated mutation rate ('fitted\_proportion\_observed') for each trinucleotide context, reference, and alternate allele, stratified by methylation levels for CpG transitions.

**Supplementary Dataset 2 | Genome-wide Gnocchi scores at 1kb scale.** A .bed file containing Gnocchi scores for 1,984,900 1kb autosomal windows (passing all quality controls). Coordinates are on GRCh38.

**Supplementary Dataset 3 | Genome-wide Gnocchi scores at 1kb sliding by 100bp scale.** A .bed file containing Gnocchi scores for 19,834,726 1kb sliding windows (passing all quality controls). Coordinates are on GRCh38.

**Supplementary Dataset 4 | Gnocchi scores of copy number variants (CNVs) in individuals with developmental delay (DD).** A total of 7,239 DD CNVs affecting the most constrained 1% of non-coding regions ( $Gnocchi \geq 4$ ) are listed. For each CNV, the highest Gnocchi score among its overlapping 1kb windows was used in analysis and is annotated.

**Supplementary Dataset 5 | Functionally informed fine-mapping results using Gnocchi as a prior.** The increase in posterior inclusion probability (PIP) when incorporating Gnocchi score as a functional prior into previous fine-mapping results (that used a uniform prior; denoted as  $PIP_{Gnocchi}$  and  $PIP_{unif}$ , respectively) are listed for 13,069 variant-trait pairs.

**Supplementary Dataset 6 | Gnocchi scores of enhancers linked to specific genes.** Enhancer-gene links were obtained from the Roadmap Epigenomics Enhancer-Gene Linking database. For each gene, the enhancer with the highest Gnocchi score was selected for analysis, and the membership of each gene in gene lists analyzed in Fig. 5b is annotated.

## Acknowledgements

### **Authors received funding as follows:**

Laura D. Gauthier: Intel, Illumina

Heidi L. Rehm: U24HG011450

Elizabeth G. Atkinson: National Institutes of Mental Health (K01MH121659), the Caroline Wiess Law Fund for Research in Molecular Medicine, and the ARCO Foundation Young Teacher-Investigator Fund at Baylor College of Medicine

Emelia J. Benjamin: R01HL092577; American Heart Association AF AHA\_18SFRN34110082

Matthew J. Bown: British Heart Foundation awards CS/14/2/30841 and RG/18/10/33842

Steven Brant: National Institutes of Health DK062431

Ravindranath Duggirala: U01 DK085524 National Institute for Diabetes and Digestive and Kidney Diseases (NIDDK)

Josée Dupuis: National Institute for Diabetes and Digestive and Kidney Diseases (NIDDK) R DK

Roberto Elosua: Agència de Gestió d'Ajuts Universitaris i de Recerca: 2021 SGR 00144

Jeanette Erdmann: VIAgenomics, Leducq network PlaQOmics, Deutsche Forschungsgemeinschaft Cluster of Excellence "Precision Medicine in Chronic Inflammation" (EXC2167);

Martti Färkkilä: State funding for university level health research

Laura D. Gauthier: Intel, Illumina

Benjamin Glaser: 5U01 DK085584

Stephen J. Glatt: U.S. NIMH Grant R MH

Leif Groop: The Academy of Finland and University of Helsinki: Center of Excellence for Complex Disease Genetics (grant number 312063 and 336822), Sigrid Jusélius Foundation; IMI 2 (grant No 115974 and 15881 )

Christopher Haiman: U01CA164973

Mikko Hiltunen: Academy of Finland (grant 338182), Sigrid Jusélius Foundation, the Strategic Neuroscience Funding of the University of Eastern Finland

Chaim Jalas: Bonei Olam

Mikko Kallela: Grants from State funding for university level health research and from Department of Neurology, Helsinki University, Central Hospital; Grant from Maire Taponen Foundation

Jaakko Kaprio: Academy of Finland (grants 312073 and 336823)

Ruth J.F. Loos: Novo Nordisk Foundation (NNF18CC0034900, NNF20OC0059313); NIH (R01DK110113; R01DK124097)

Ronald C.W. Ma: Research Grants Council of the Hong Kong Special Administrative Region (CU R4012-18), Research Grants Council Theme-based Research Scheme (T12-402/13N), University Grants Committee Research Grants Matching Scheme

Jaume Marrugat: Agència de Gestió d'Ajuts Universitaris i de Recerca: 2021 SGR 00144

Jacob L. McCauley: National Institute of Diabetes and Digestive and Kidney Disease Grant R01DK104844

Michael C. O'Donovan: Medical Research Council UK: Centre Grant No. MR/L010305/1, Program Grant No. G0800509

Yukinori Okada: JSPS KAKENHI (19H01021, 20K21834), AMED (JP21km0405211, JP21ek0109413, JP21gm4010006, JP21km0405217, JP21ek0410075), JST Moonshot R&D (JPMJMS2021)

Michael J. Owen: Medical Research Council UK: Centre Grant No. MR/L010305/1, Program Grant No. G0800509

Aarno Palotie: the Academy of Finland Center of Excellence for Complex Disease Genetics (grant numbers 312074 and 336824) and Sigrid Jusélius Foundation

Heidi L. Rehm: U24HG011450

John D. Rioux: National Institute of Diabetes and Digestive and Kidney Diseases (NIDDK; DK062432), from the Canadian Institutes of Health (CIHR GPG 102170), from Genome Canada/Génomique Québec (GPH-129341), and a Canada Research Chair (#230625)

Samuli Ripatti: the Academy of Finland Center of Excellence for Complex Disease Genetics (grant number )  
Sigrid Jusélius Foundation

Jerome I. Rotter: Trans-Omics in Precision Medicine (TOPMed) program was supported by the National Heart, Lung and Blood Institute (NHLBI). WGS for “NHLBI TOPMed: Multi-Ethnic Study of Atherosclerosis (MESA)” (phs001416.v1.p1) was performed at the Broad Institute of MIT and Harvard (3U54HG003067-13S1). Core support including centralized genomic read mapping and genotype calling, along with variant quality metrics and filtering were provided by the TOPMed Informatics Research Center (3R01HL-117626-02S1; contract HHSN268201800002I). Core support including phenotype harmonization, data management, sample-identity QC, and general program coordination were provided by the TOPMed Data Coordinating Center (R01HL-120393; U01HL-120393; contract HHSN268201800001I). We gratefully acknowledge the studies and participants who provided biological samples and data for MESA and TOPMed. JSK was supported by the Pulmonary Fibrosis Foundation Scholars Award and grant K23-HL-150301 from the NHLBI. MRA was supported by grant K23-HL-150280, AJP was supported by grant K23-HL-140199, and AM was supported by R01-HL131565 from the NHLBI. EJB was supported by grant K23-AR-075112 from the National Institute of Arthritis and Musculoskeletal and Skin Diseases. The MESA project is conducted and supported by the National Heart, Lung, and Blood Institute (NHLBI) in collaboration with MESA investigators. Support for MESA is provided by contracts 75N92020D00001, HHSN268201500003I, N01-HC-95159, 75N92020D00005, N01-HC-95160, 75N92020D00002, N01-HC-95161, 75N92020D00003, N01-HC-95162, 75N92020D00006, N01-HC-95163, 75N92020D00004, N01-HC-95164, 75N92020D00007, N01-HC-95165, N01-HC-95166, N01-HC-95167, N01-HC-95168, N01-HC-95169, UL1-TR-000040, UL1-TR-001079, and UL1-TR-001420. Also supported in part by the National Center for Advancing Translational Sciences, CTSI grant UL1TR001881, and the National Institute of Diabetes and Digestive and Kidney Disease Diabetes Research Center (DRC) grant DK063491 to the Southern California Diabetes Endocrinology Research Center

Veikko Salomaa: Juho Vainio Foundation and Finnish Foundation for Cardiovascular Research

Jeremiah Scharf: NIH Grants U01 NS40024, K02 NS085048, NS102371

Eleanor G. Seaby: Kerkut Charitable Trust, Foulkes Fellowship, University of Southampton Presidential Scholarship

Edwin K. Silverman: NIH Grants U01 HL089856 and U01 HL089897

J. Gustav Smith: The Swedish Heart-Lung Foundation (2022-0344, 2022-0345), the Swedish Research Council (2021-02273), the European Research Council (ERC-STG-2015-679242), Gothenburg University, Skåne University Hospital, governmental funding of clinical research within the Swedish National Health Service, a generous donation from the Knut and Alice Wallenberg foundation to the Wallenberg Center for Molecular Medicine in Lund, and funding from the Swedish Research Council (Linnaeus grant Dnr 349-2006-237, Strategic Research Area Exodiab Dnr 2009-1039) and Swedish Foundation for Strategic Research (Dnr IRC15-0067) to the Lund University Diabetes Center

Nathan O. Stitzel: National Human Genome Reserach Institute Grant UM1HG008853

Kent D. Taylor: Trans-Omics in Precision Medicine (TOPMed) program was supported by the National Heart, Lung and Blood Institute (NHLBI). WGS for “NHLBI TOPMed: Multi-Ethnic Study of Atherosclerosis (MESA)” (phs001416.v1.p1) was performed at the Broad Institute of MIT and Harvard (3U54HG003067-13S1). Core support including centralized genomic read mapping and genotype calling, along with variant quality metrics and filtering were provided by the TOPMed Informatics Research Center (3R01HL-117626-02S1; contract HHSN268201800002I). Core support including phenotype harmonization, data management, sample-identity QC, and general program coordination were provided by the TOPMed Data Coordinating Center (R01HL-120393; U01HL-120393; contract HHSN268201800001I). We gratefully acknowledge the studies and participants who provided biological samples and data for MESA and TOPMed. JSK was supported by the Pulmonary Fibrosis Foundation Scholars Award and grant K23-HL-150301 from the NHLBI. MRA was supported by grant K23-HL-150280, AJP was supported by grant K23-HL-140199, and AM was supported by R01-HL131565 from the NHLBI. EJB was supported by grant K23-AR-075112 from the National Institute of Arthritis and Musculoskeletal and Skin Diseases. The MESA project is conducted and supported by the National Heart, Lung, and Blood Institute (NHLBI) in collaboration with MESA investigators. Support for MESA

is provided by contracts 75N92020D00001, HHSN268201500003I, N01-HC-95159, 75N92020D00005, N01-HC-95160, 75N92020D00002, N01-HC-95161, 75N92020D00003, N01-HC-95162, 75N92020D00006, N01-HC-95163, 75N92020D00004, N01-HC-95164, 75N92020D00007, N01-HC-95165, N01-HC-95166, N01-HC-95167, N01-HC-95168, N01-HC-95169, UL1-TR-000040, UL1-TR-001079, and UL1-TR-001420. Also supported in part by the National Center for Advancing Translational Sciences, CTSI grant UL1TR001881, and the National Institute of Diabetes and Digestive and Kidney Disease Diabetes Research Center (DRC) grant DK063491 to the Southern California Diabetes Endocrinology Research Center

Tiinamaija Tuomi: The Academy of Finland and University of Helsinki: Center of Excellence for Complex Disease Genetics (grant number 312072 and 336826 ), Folkhalsan Research Foundation, Helsinki University Hospital, Ollqvist Foundation, Liv och Halsas foundation; NovoNordisk Foundation

Teresa Tusie-Luna: CONACyT Project 312688

James S. Ware: Medical Research Council (UK), NIHR Imperial College Biomedical Research Centre, British Heart Foundation [RE/18/4/34215], Sir Jules Thorn Charitable Trust [21JTA]

Rinse K. Weersma: The Lifelines Biobank initiative has been made possible by subsidy from the Dutch Ministry of Health Welfare and Sport the Dutch Ministry of Economic Affairs the University Medical Centre Groningen (UMCG the Netherlands ) the University of Groningen and the Northern Provinces of the Netherlands

## References

- 1000 Genomes Project Consortium, Adam Auton, Lisa D. Brooks, Richard M. Durbin, Erik P. Garrison, Hyun Min Kang, Jan O. Korb, et al. 2015. "A Global Reference for Human Genetic Variation." *Nature* 526 (7571): 68–74.
- Bergström, Anders, Shane A. McCarthy, Ruoyun Hui, Mohamed A. Almarri, Qasim Ayub, Petr Danecek, Yuan Chen, et al. 2020. "Insights into Human Genetic Variation and Population History from 929 Diverse Genomes." *Science* 367 (6484). <https://doi.org/10.1126/science.aay5012>.
- Conomos, Matthew P., Alexander P. Reiner, Bruce S. Weir, and Timothy A. Thornton. 2016. "Model-Free Estimation of Recent Genetic Relatedness." *American Journal of Human Genetics* 98 (1): 127–48.
- Diaz-Papkovich, Alex, Luke Anderson-Trocme, and Simon Gravel. 2018. "Revealing Multi-Scale Population Structure in Large Cohorts." *bioRxiv*, September, 423632.
- Hail Team. Hail 0.2.62-84fa81b9ea3d. <https://github.com/hail-is/hail/commit/84fa81b9ea3d>.
- Karczewski, Konrad J., Laurent C. Francioli, Grace Tiao, Beryl B. Cummings, Jessica Alföldi, Qingbo Wang, Ryan L. Collins, et al. 2020. "The Mutational Constraint Spectrum Quantified from Variation in 141,456 Humans." *Nature* 581 (7809): 434–43.
- Karczewski, Konrad J., Matthew Solomonson, Katherine R. Chao, Julia K. Goodrich, Grace Tiao, Wenhan Lu, Bridget M. Riley-Gillis, et al. 2021. "Systematic Single-Variant and Gene-Based Association Testing of 3,700 Phenotypes in 281,850 UK Biobank Exomes." *bioRxiv*. medRxiv. <https://doi.org/10.1101/2021.06.19.21259117>.
- McInnes, Leland, John Healy, Nathaniel Saul, and Lukas Großberger. 2018. "UMAP: Uniform Manifold Approximation and Projection." *Journal of Open Source Software* 3 (29): 861.
- Purcell, Shaun M., Jennifer L. Moran, Menachem Fromer, Douglas Ruderfer, Nadia Solovieff, Panos Roussos, Colm O'Dushlaine, et al. 2014. "A Polygenic Burden of Rare Disruptive Mutations in Schizophrenia." *Nature* 506 (7487): 185–90.
